# Supplementary material
Source: Royal Society of Chemistry journal article supplement (doi:10.1039/d6nj00839a)
Supplement: d6nj00839a1.pdf [file d6nj00839a1.pdf]

## **Supporting Information**

### **Al-doped spinel $\text{LiMn}_2\text{O}_4$ anchored on diatomaceous earth for selective lithium adsorption under simulated brine conditions**

Shraddha Yadav<sup>1</sup>, Irfan T.<sup>1</sup>, Tabish Nawaz\*<sup>1</sup>

<sup>1</sup>Environmental Science and Engineering Department (ESED), Indian Institute of Technology

Bombay, Mumbai 400076, India

\*Corresponding author: [tnawaz@iitb.ac.in](mailto:tnawaz@iitb.ac.in)

#### **Captions**

**Table S1.** Experimental dataset used for response surface analysis showing the influence of synthesis parameters on lithium removal efficiency

**Table S2.** Isotherm model parameters for  $\text{Li}^+$  adsorption on HAMO/DE

**Fig. S1.** Pearson correlation chart of synthesis parameter based on RSM

**Table S1.** Experimental dataset used for response surface analysis showing the influence of synthesis parameters on lithium removal efficiency

| <b>Run</b> | <b>Calcination time<br/>(hr)</b> | <b>Li/Mn<br/>ratio</b> | <b>DE amount<br/>(g)</b> | <b>Al-Dopant<br/>ratio (%)</b> | <b>Removal<br/>efficiency (%)</b> |
|------------|----------------------------------|------------------------|--------------------------|--------------------------------|-----------------------------------|
| 1          | 8                                | 1                      | 4.05                     | 0                              | 32                                |
| 2          | 8                                | 1                      | 4.05                     | 2                              | 44.01                             |
| 3          | 8                                | 1                      | 4.05                     | 5                              | 51.81                             |
| 4          | 8                                | 1                      | 4.05                     | 10                             | 43.2                              |
| 5          | 8                                | 1                      | 8.1                      | 0                              | 23.04                             |
| 6          | 8                                | 1                      | 8.1                      | 2                              | 31.88                             |
| 7          | 8                                | 1                      | 8.1                      | 5                              | 36.14                             |
| 8          | 8                                | 1                      | 8.1                      | 10                             | 25.78                             |
| 9          | 8                                | 2                      | 4.05                     | 0                              | 30.72                             |
| 10         | 8                                | 2                      | 4.05                     | 2                              | 46.37                             |
| 11         | 8                                | 2                      | 4.05                     | 5                              | 43.66                             |
| 12         | 8                                | 2                      | 4.05                     | 10                             | 38.09                             |
| 13         | 8                                | 2                      | 8.1                      | 0                              | 12.14                             |
| 14         | 8                                | 2                      | 8.1                      | 2                              | 25.84                             |
| 15         | 8                                | 2                      | 8.1                      | 5                              | 34.2                              |
| 16         | 8                                | 2                      | 8.1                      | 10                             | 20.59                             |
| 17         | 8                                | 0.5                    | 4.05                     | 0                              | 40.98                             |
| 18         | 8                                | 0.5                    | 4.05                     | 2                              | 59.55                             |
| 19         | 8                                | 0.5                    | 4.05                     | 5                              | 67.08                             |
| 20         | 8                                | 0.5                    | 4.05                     | 10                             | 46.17                             |
| 21         | 8                                | 0.5                    | 8.1                      | 0                              | 23.08                             |
| 22         | 8                                | 0.5                    | 8.1                      | 2                              | 38.17                             |
| 23         | 8                                | 0.5                    | 8.1                      | 5                              | 47.11                             |
| 24         | 8                                | 0.5                    | 8.1                      | 10                             | 41.67                             |
| 25         | 12                               | 0.5                    | 4.05                     | 0                              | 67.35                             |
| 26         | 12                               | 0.5                    | 4.05                     | 2                              | 74.87                             |
| 27         | 12                               | 0.5                    | 4.05                     | 5                              | 78.44                             |

|           |    |     |      |    |       |
|-----------|----|-----|------|----|-------|
| <b>28</b> | 12 | 0.5 | 4.05 | 10 | 69.31 |
| <b>29</b> | 8  | 0.5 | 2    | 2  | 60.66 |
| <b>30</b> | 8  | 0.5 | 2    | 5  | 76.59 |
| <b>31</b> | 8  | 0.5 | 2    | 10 | 67.74 |
| <b>32</b> | 8  | 0.5 | 2    | 15 | 58.79 |
| <b>33</b> | 12 | 0.5 | 2    | 2  | 83.58 |
| <b>34</b> | 12 | 0.5 | 2    | 5  | 86.83 |
| <b>35</b> | 12 | 0.5 | 2    | 10 | 79.19 |
| <b>36</b> | 12 | 0.5 | 2    | 15 | 76.48 |

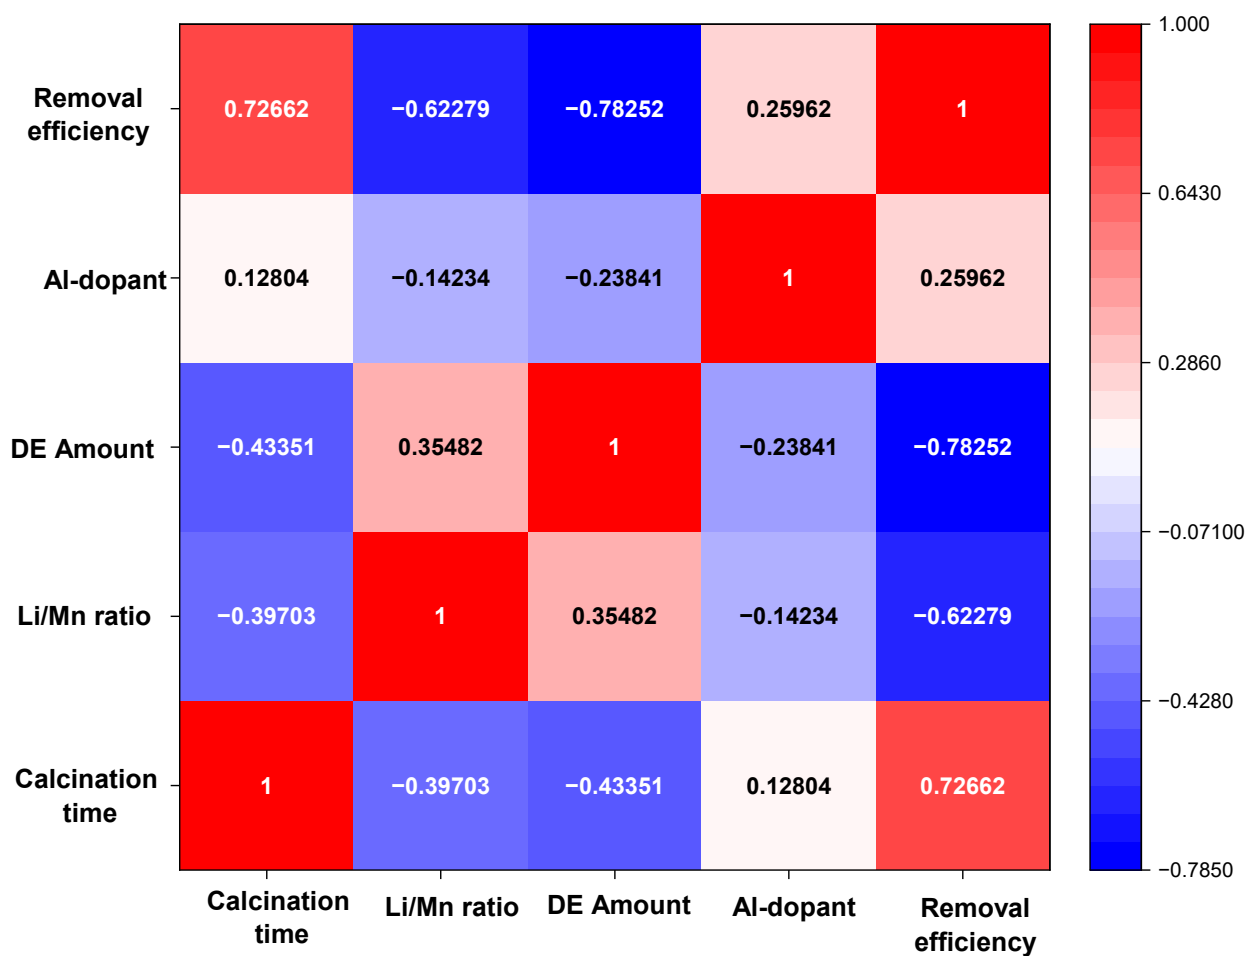

**Fig. S1.** Pearson correlation chart of synthesis parameter based on RSM

**Table S2.** Isotherm model parameters for Li<sup>+</sup> adsorption on HAMO/DE

**(a) Langmuir isotherm**

| Parameters | $q_{\max}$ | $K_L$ | $C_e \text{ exp}$ | $q_e \text{ exp}$ | $C_e \text{ pred}$ | $q_e \text{ pred}$ | $R^2$  |
|------------|------------|-------|-------------------|-------------------|--------------------|--------------------|--------|
| Values     | 27.40      | 0.074 | 1.25              | 3.52              | 1.828              | 3.27               | 0.9804 |

**(b) Freundlich isotherm**

| Parameters | 1/n    | $K_F$ | $C_e \text{ exp}$ | $q_e \text{ exp}$ | $C_e \text{ pred}$ | $q_e \text{ pred}$ | $R^2$  |
|------------|--------|-------|-------------------|-------------------|--------------------|--------------------|--------|
| Values     | 0.1397 | 12.45 | 1.25              | 3.52              | 0.0055             | 6.02               | 0.7954 |
